# Supplementary material
Source: PubMed Central journal article supplement (PMC6732383)
Supplement: rspb20191278_review_history.pdf [file rspb20191278_review_history.pdf]

## From synaptic input to muscle contraction: arm muscle cells of *Octopus vulgaris* show unique neuromuscular junction and excitation–contraction coupling properties

Nir Neshet, Federica Maiole, Tal Shomrat, Benjamin Hochner and Letizia Zullo

### Article citation details

*Proc. R. Soc. B* **286**: 20191278.

<http://dx.doi.org/10.1098/rspb.2019.1278>

### Review timeline

Original submission: 5 June 2019  
Revised submission: 30 July 2019  
Final acceptance: 5 August 2019

Note: Reports are unedited and appear as submitted by the referee. The review history appears in chronological order.

## Review History

### RSPB-2019-1278.R0 (Original submission)

#### Review form: Reviewer 1

##### Recommendation

Accept as is

##### Scientific importance: Is the manuscript an original and important contribution to its field?

Excellent

##### General interest: Is the paper of sufficient general interest?

Excellent

##### Quality of the paper: Is the overall quality of the paper suitable?

Good

##### Is the length of the paper justified?

Yes

**Should the paper be seen by a specialist statistical reviewer?**

No

**Do you have any concerns about statistical analyses in this paper? If so, please specify them explicitly in your report.**

No

**It is a condition of publication that authors make their supporting data, code and materials available - either as supplementary material or hosted in an external repository. Please rate, if applicable, the supporting data on the following criteria.**

**Is it accessible?**

N/A

**Is it clear?**

N/A

**Is it adequate?**

N/A

**Do you have any ethical concerns with this paper?**

No

#### **Comments to the Author**

The present manuscript is an important step in better understanding how the flexible muscular hydrostat system of an octopus works. The authors combine functional and morphological data to help understand how this system is controlled and operated.

While the paper is scientifically amazing its style and language need some work and editing by native speakers.

## **Review form: Reviewer 2**

#### **Recommendation**

Accept with minor revision (please list in comments)

**Scientific importance: Is the manuscript an original and important contribution to its field?**

Excellent

**General interest: Is the paper of sufficient general interest?**

Excellent

**Quality of the paper: Is the overall quality of the paper suitable?**

Excellent

**Is the length of the paper justified?**

Yes

**Should the paper be seen by a specialist statistical reviewer?**

No

**Do you have any concerns about statistical analyses in this paper? If so, please specify them explicitly in your report.**

No

**It is a condition of publication that authors make their supporting data, code and materials available - either as supplementary material or hosted in an external repository. Please rate, if applicable, the supporting data on the following criteria.**

**Is it accessible?**

Yes

**Is it clear?**

Yes

**Is it adequate?**

Yes

**Do you have any ethical concerns with this paper?**

No

#### **Comments to the Author**

This is a fine paper addressing the neuromuscular physiology of cephalopod muscle. It is quite well written and informative, and the results are technically well acquired. The only quibble I have is that the authors are so wrapped up with the octopus as an "intelligent" animal that they seem to only wish to compare it with mammals and arthropods in terms of physiology and behavior. It would be appropriate here to briefly review the previous literature, on molluscan neuromuscular physiology and structure. It is, after all, more germane to a comparative work. In particular, there is a body of work on pelecypods and gastropods that ought to be consulted. Indeed, gastropods are the sister group to cephalopods and there are many resemblances. The authors might look at Gilloteaux, Z. Zellforsch. 124, 204-216 (1972) for commonalities, and the review Heyer and Kater, AMER. ZOOL., 13:247-270 (1973), could be a useful place to start. I think that without that, the vertebrate and arthropod comparisons don't have significant impact beyond "gee-whiz". The case is claimed that cephalopods have a unique neuromuscular system, but the evidence is certainly incomplete. And it came from somewhere.

## **Decision letter (RSPB-2019-1278.R0)**

16-Jul-2019

Dear Dr Zullo

I am pleased to inform you that your Review manuscript RSPB-2019-1278 entitled "From synaptic input to muscle contraction: arm muscle cells of *Octopus vulgaris* show unique neuromuscular junction and E-C coupling properties" has been accepted for publication in Proceedings B. Congratulations!

The referee(s) do not recommend any further changes. Therefore, please proof-read your manuscript carefully and upload your final files for publication. Because the schedule for publication is very tight, it is a condition of publication that you submit the revised version of your manuscript within 7 days. If you do not think you will be able to meet this date please let me know immediately.

To upload your manuscript, log into <http://mc.manuscriptcentral.com/prsb> and enter your Author Centre, where you will find your manuscript title listed under "Manuscripts with Decisions." Under "Actions," click on "Create a Revision." Your manuscript number has been appended to denote a revision.

You will be unable to make your revisions on the originally submitted version of the manuscript. Instead, upload a new version through your Author Centre.

Before uploading your revised files please make sure that you have:

1) A text file of the manuscript (doc, txt, rtf or tex), including the references, tables (including captions) and figure captions. Please remove any tracked changes from the text before submission. PDF files are not an accepted format for the "Main Document".

2) A separate electronic file of each figure (tiff, EPS or print-quality PDF preferred). The format should be produced directly from original creation package, or original software format. Please note that PowerPoint files are not accepted.

3) Electronic supplementary material: this should be contained in a separate file from the main text and the file name should contain the author's name and journal name, e.g. `authurname_procb_ESM_figures.pdf`

All supplementary materials accompanying an accepted article will be treated as in their final form. They will be published alongside the paper on the journal website and posted on the online figshare repository. Files on figshare will be made available approximately one week before the accompanying article so that the supplementary material can be attributed a unique DOI. Please see: <https://royalsociety.org/journals/authors/author-guidelines/>

4) Data-Sharing and data citation

It is a condition of publication that data supporting your paper are made available. Data should be made available either in the electronic supplementary material or through an appropriate repository. Details of how to access data should be included in your paper. Please see <https://royalsociety.org/journals/ethics-policies/data-sharing-mining/> for more details.

If you wish to submit your data to Dryad (<http://datadryad.org/>) and have not already done so you can submit your data via this link

<http://datadryad.org/submit?journalID=RSPB&manu=RSPB-2019-1278> which will take you to your unique entry in the Dryad repository.

If you have already submitted your data to dryad you can make any necessary revisions to your dataset by following the above link.

5) For more information on our Licence to Publish, Open Access, Cover images and Media summaries, please visit <https://royalsociety.org/journals/authors/author-guidelines/>.

Once again, thank you for submitting your manuscript to Proceedings B and I look forward to receiving your final version. If you have any questions at all, please do not hesitate to get in touch.

Sincerely,

Professor John Hutchinson, Editor

<mailto:proceedingsb@royalsociety.org>

Associate Editor Board Member: 1

Comments to Author:

Your manuscript has now been reviewed by two external reviewers. Both agree the research is very interesting and of high quality. When revising the manuscript, please take Reviewer 2's comment into strong consideration by making sure to expand your comparative framework to mollusks more broadly. Please also review the text for clarity and grammatical consistency.

Reviewer(s)' Comments to Author:

Referee: 1

Comments to the Author(s)

The present manuscript is an important step in better understanding how the flexible muscular hydrostat system of an octopus works. The authors combine functional and morphological data to help understand how this system is controlled and operated.

While the paper is scientifically amazing its style and language need some work and editing by native speakers.

Referee: 2

Comments to the Author(s)

This is a fine paper addressing the neuromuscular physiology of cephalopod muscle. It is quite well written and informative, and the results are technically well acquired. The only quibble I have is that the authors are so wrapped up with the octopus as an "intelligent" animal that they seem to only wish to compare it with mammals and arthropods in terms of physiology and behavior. It would be appropriate here to briefly review the previous literature, on molluscan neuromuscular physiology and structure. It is, after all, more germane to a comparative work. In particular, there is a body of work on pelecypods and gastropods that ought to be consulted. Indeed, gastropods are the sister group to cephalopods and there are many resemblances. The authors might look at Gilloteaux, *Z. Zellforsch.* 124, 204-216 (1972) for commonalities, and the review Heyer and Kater, *AMER. ZOOL.*, 13:247-270 (1973), could be a useful place to start. I think that without that, the vertebrate and arthropod comparisons don't have significant impact beyond "gee-whiz". The case is claimed that cephalopods have a unique neuromuscular system, but the evidence is certainly incomplete. And it came from somewhere.

## Author's Response to Decision Letter for (RSPB-2019-1278.R0)

See Appendix A.

## Decision letter (RSPB-2019-1278.R1)

05-Aug-2019

Dear Dr Zullo

I am pleased to inform you that your manuscript entitled "From synaptic input to muscle

contraction: arm muscle cells of *Octopus vulgaris* show unique neuromuscular junction and E-C coupling properties" has been accepted for publication in Proceedings B. Congratulations!!

You can expect to receive a proof of your article from our Production office in due course, please check your spam filter if you do not receive it. PLEASE NOTE: you will be given the exact page length of your paper which may be different from the estimation from Editorial and you may be asked to reduce your paper if it goes over the 10 page limit.

If you are likely to be away from e-mail contact please let us know. Due to rapid publication and an extremely tight schedule, if comments are not received, we may publish the paper as it stands.

If you have any queries regarding the production of your final article or the publication date please contact [procb\\_proofs@royalsociety.org](mailto:procb_proofs@royalsociety.org)

#### Open Access

You are invited to opt for Open Access, making your freely available to all as soon as it is ready for publication under a CCBY licence. Our article processing charge for Open Access is £1700.

Corresponding authors from member institutions

(<http://royalsocietypublishing.org/site/librarians/allmembers.xhtml>) receive a 25% discount to these charges. For more information please visit <http://royalsocietypublishing.org/open-access>.

Your article has been estimated as being 10 pages long. Our Production Office will be able to confirm the exact length at proof stage.

#### Paper charges

An e-mail request for payment of any related charges will be sent out after proof stage (within approximately 2-6 weeks). The preferred payment method is by credit card; however, other payment options are available

#### Electronic supplementary material:

All supplementary materials accompanying an accepted article will be treated as in their final form. They will be published alongside the paper on the journal website and posted on the online figshare repository. Files on figshare will be made available approximately one week before the accompanying article so that the supplementary material can be attributed a unique DOI.

Thank you for your fine contribution. On behalf of the Editors of the Proceedings B, we look forward to your continued contributions to the Journal.

Sincerely,

Professor John Hutchinson  
Editor, Proceedings B  
<mailto:proceedingsb@royalsociety.org>

## **Appendix A**

Dear Prof. John Hutchinson

We want to thank the Reviewers for their comments. As a response to Associate Editor Board Member: 1 and Referee: 2 Comments to the Author(s) we added a new section of broad comparison the octopus neuromuscular system of the arm to those other mollusks emphasizing the large diversity that is found in other mollusks neuromuscular system (paragraph starts at page 11 line 28).

In addition, we revised the section that compares the octopus arm neuromuscular system to those of vertebrate and arthropods explaining why the comparison to these systems is more relevant for understanding the functional implication of our findings. We think this give an instructive bottom-up view on the organization of motor control of flexible arms (Page 12 line 5).

We also revised the entire text for spelling and grammar slips.

We thank you for the appreciation of our work and for your support.

Sincerely

Nir Neshet

Letizia Zullo
